# Supplementary material for: Ethyl Gallate Dual-Targeting PTPN6 and PPARγ Shows Anti-Diabetic and Anti-Obese Effects
Source: Int J Mol Sci. 2022 Apr 30;23(9):5020. doi: 10.3390/ijms23095020 (PMC9105384; doi:10.3390/ijms23095020)
Supplement: Supplementary file 1 [file ijms-23-05020-s001.zip › ijms-1699784-supplementary.pdf]

## Supplementary Information

### Ethyl gallate dual-targeting PTPN6 and PPAR $\gamma$ shows anti-diabetic and anti-obese effects

Dohee Ahn <sup>1,†</sup>, Jinsoo Kim <sup>1,†</sup>, Gibeom Nam <sup>1</sup>, Xiaodi Zhao <sup>1</sup>, Jihee Kwon <sup>2</sup>, Ji Young Hwang <sup>1</sup>, Jae Kwan Kim <sup>1</sup>, Sun-Young Yoon <sup>3</sup>, and Sang J. Chung <sup>1,2,\*</sup>

<sup>1</sup> School of Pharmacy, Sungkyunkwan University, Suwon 16419, Republic of Korea; ehgm194@naver.com (D.A.); neto543@naver.com (J.K.); skarlqja12@g.skku.edu (G.N.); zhaoxiaodi1019@gmail.com (X.Z.); smalemaster@naver.com (J.Y.H.); jk941002@naver.com (J.K.K.)

<sup>2</sup> Department of Biopharmaceutical Convergence, Sungkyunkwan University, Suwon 16419, Republic of Korea; yg1549@naver.com (J.K.)

<sup>3</sup> Department of Cosmetic Science, Kwangju Women's University, Gwangju 62396, Republic of Korea; dalae1104@gmail.com (S.-Y.Y.)

\* Corresponding author: sjchung@skku.edu

† These authors contributed equally to this work.

## List of Contents

|                                                                                                          |    |
|----------------------------------------------------------------------------------------------------------|----|
| Figure S1. The sequence of purified PTPN6. ....                                                          | 2  |
| Figure S2. SDS-PAGE analysis of PTPN6 purification. ..                                                   | 3  |
| Figure S3. Michaelis–Menten plots and Lineweaver–Burk plots. ....                                        | 4  |
| Figure S4. Inhibitory activity of ethyl gallate (EG) against PTPN6. ....                                 | 5  |
| Figure S5. Viability of PTPN6 inhibitors in CHO cells. ....                                              | 6  |
| Figure S6. Comparison of anti-adipogenesis effects between ethyl gallate (EG) and gallic acid (GA). .... | 7  |
| Figure S7. Ethyl gallate (EG) treatment upregulates glucose uptake in C2C12 cells. ....                  | 8  |
| Figure S8. Knockdown of PTPN6 in C2C12 cells. ....                                                       | 9  |
| Table S1. List of compound names of PTPN6 inhibitors corresponding to compound numbers .....             | 10 |
| Table S2. Details of the recombinant constructs and optimized purification methods .....                 | 11 |
| Table S3. Kinetic properties of 20 PTPs .....                                                            | 12 |
| Table S4. The sequence of PTPN6 siRNA .....                                                              | 13 |
| Table S5. The sequence of primers .....                                                                  | 14 |

MHHHHHHSSGLVPRGSGMKETAALKFERQHMDSEVDGDLGTMADIGSEFMVRWFHRDLSGLDAETLLKGRG  
VHGSFLARPSRKNGDFSLSVRVGDQVTHIRIQNSGDFYDLYGGEKFATLTELVEYYTQQQGVLDQDRDGTIIHLK  
YPLNCSDPTSERWYHGHMSGGQAETLLQAKGEPWTFVRESLSQPGDFVLSVLSQPKAGPGSPLRVTHIKVM  
CEGGRYTVGGLETDFSLDLEHFKKTGIEEASGAFVYLRQPYATRVNAADIENRVLELNKKQSEDTAKAGFW  
EEFESLQKQEVKNLHQRLEGQRPENKGNRYKNILPFDHSRVILQGRDSNIPGSDYINANYIKNQLLGPDENAKT  
YIASQGCLEATVNDFWQMAWQENSRVIVMTTREVVEKGRNKCVPYWPEVGMQRAYGPYSVTNCGEHDTEYKL  
RTLQVSPLDNGDLIREIWHYQYLSWPDHGVPEPGGVLSFLDQINQRQESLPHAGPIIVHCSAGIGRTGTIIVIDML  
MENISTKGLDCDIDIQKTIQMVRAQRSGMVQTEAQYKFIYVAIAQFIETTKKKLEVLQSQKGQSEYGNITYPPAM  
KNAHAKASRTSSKHKEDVYENLHTKNKREEKVKKQRSADKEKSKGSLKRK

**Figure S1.** The sequence of purified PTPN6 with an N-terminal hexahistidine tag. The complete sequence of human PTPN6 (1-595) used for recombinant DNA construction is highlighted in red.

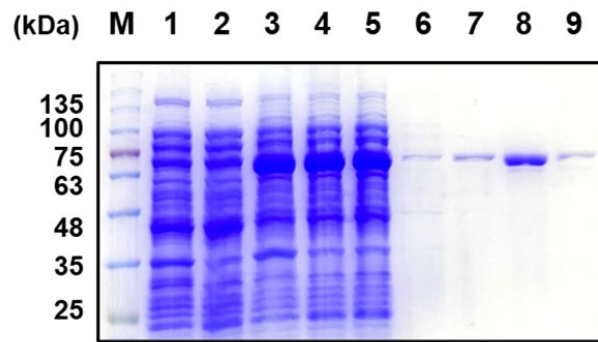

**Figure S2.** SDS-PAGE analysis of PTPN6 (molecular weight: 73.0 kDa) purification. PTPN6 with an N-terminal hexahistidine tag was purified using TALON affinity resin after expression in the *Escherichia coli* system. M: molecular weight marker; 1: total cell lysate before induction; 2: supernatant before induction; 3: total cell lysate after induction; 4: supernatant after induction; 5: sample after passing the supernatant through the resin; 6: sample after washing with lysis buffer; 7: sample after washing with lysis buffer containing 10 mM imidazole, 8–9: protein eluted with lysis buffer containing 100 mM imidazole.

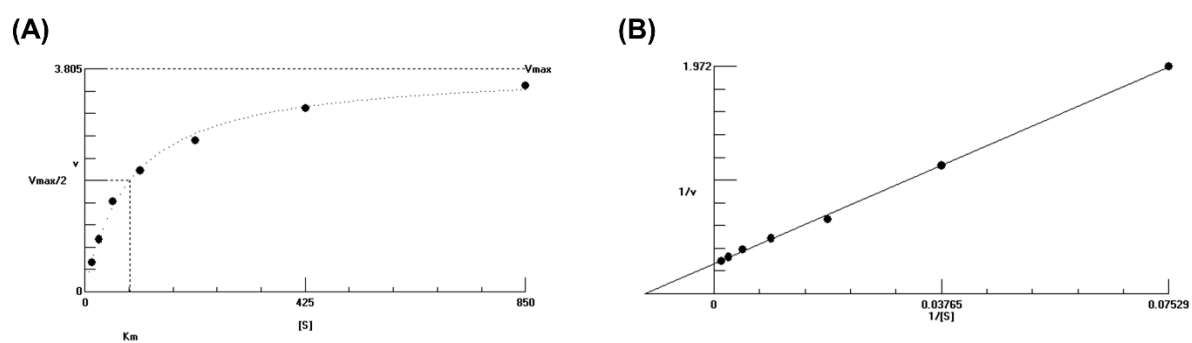

**Figure S3.** Michaelis–Menten plots (A) and Lineweaver–Burk plots (B) for the calculation of  $K_m$  and  $V_{max}$ . PTPN6 (2.0 nM) was added to the reaction buffer at various concentrations (850, 425, 212.5, 106.3, 53.1, 26.6, and 13.3  $\mu M$ ).

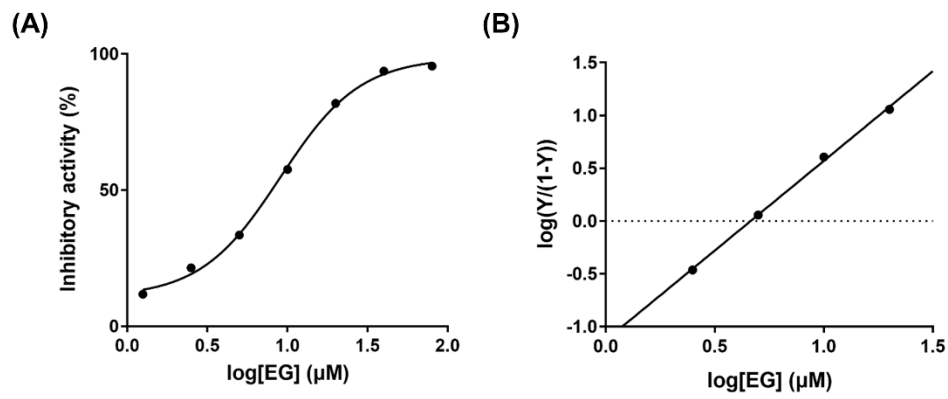

**Figure S4.** Inhibitory activity of ethyl gallate (EG) against PTPN6. PTPN6 (2.0 nM) was simultaneously added to the reaction buffer containing DiFMUP (173 μM) after the addition of various concentrations of ethyl gallate (80, 40, 20, 10, 5, 2.5, and 1.3 μM). (A) Half maximal inhibitory concentration (IC<sub>50</sub>) value was determined to be 9.0 μM from the dose-response curves. (B) The Hill coefficient (n<sub>H</sub>) was determined to be 1.7 from the Hill plot.

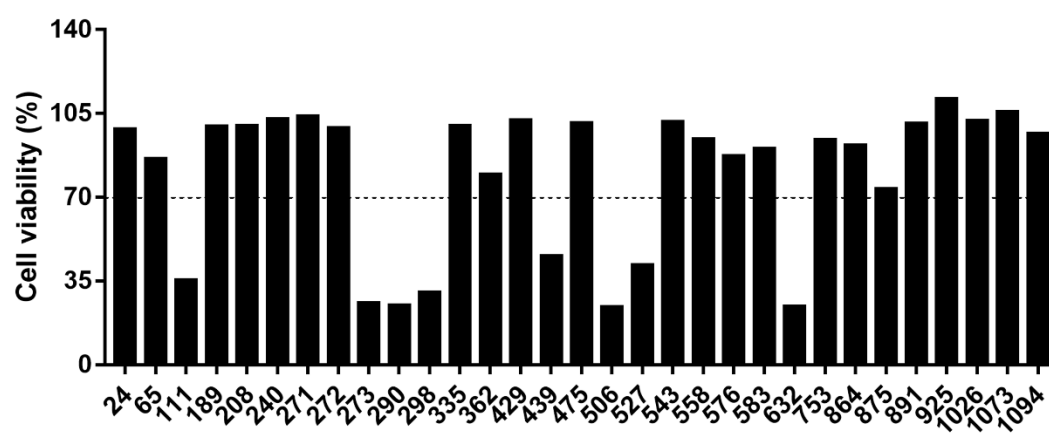

**Figure S5.** Viability of PTPN6 inhibitors in CHO cells. After a 6 h co-transfection with pCMV6-hPPARG-GFP and pPPRE-TK-luc, CHO cells were treated with compounds at 20  $\mu$ M in the presence of 2  $\mu$ M rosiglitazone and incubated for 24 h. The compound names corresponding to compound numbers are listed in Table S2.

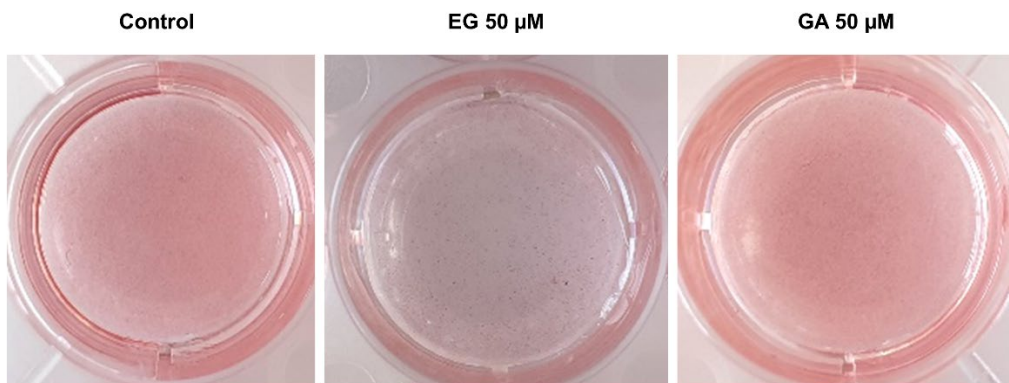

**Figure S6.** Comparison of anti-adipogenesis effects between ethyl gallate (EG) and gallic acid (GA). After treatment with 50  $\mu$ M of each compound for 6 days during differentiation, the cells were stained with an Oil red O solution.

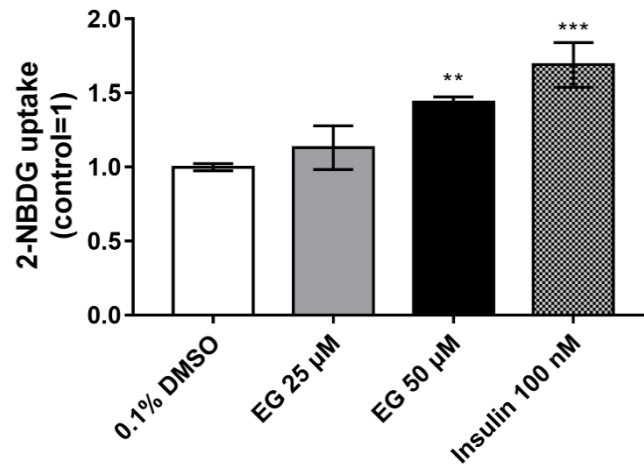

**Figure S7.** Ethyl gallate (EG) treatment upregulates glucose uptake in C2C12 cells. Differentiation of C2C12 cells was induced by changing the culture medium to DMEM containing 2% horse serum after reaching 90% confluency. After five days, differentiated C2C12 cells were incubated overnight with low-glucose DMEM for starvation, followed by treatment with EG (6 h) or insulin (30 min) in glucose-depleted DMEM with 0.1% DMSO. The cells were treated with 100  $\mu$ M 2-NBDG for 30 min. The fluorescence intensity was detected at Ex/Em=485/535 nm using a microplate reader after washing with cold DPBS.

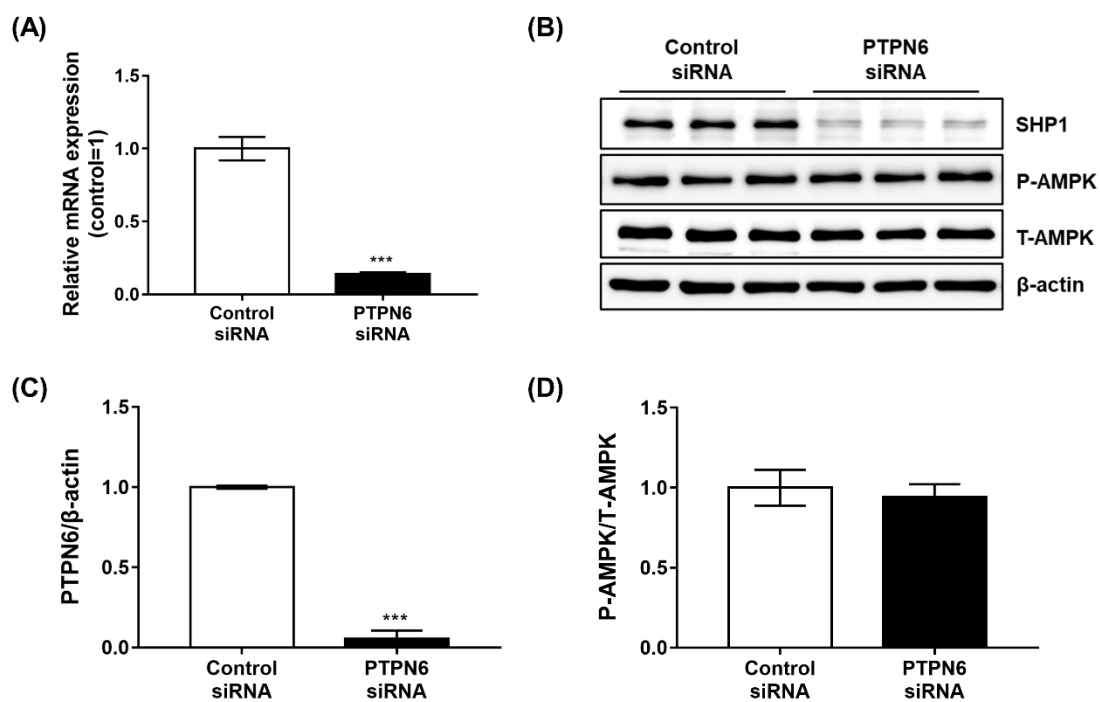

**Figure S8.** Knockdown of PTPN6 in C2C12 cells. C2C12 cells were transfected with PTPN6 siRNA for 48 h. After cell lysis, the expression of PTPN6 was analyzed by quantitative real-time polymerase chain reaction (qRT-PCR) (A) and western blotting (B, C). Changes in AMPK phosphorylation following the knockdown of PTPN6 were analyzed by western blotting (B). Quantification was performed and normalized to the control using CSAnalyzer 4 (C, D). Data are shown as the mean  $\pm$  standard deviation ( $n=3$ ). \*\*\*  $p < 0.001$ .

**Table S1.** List of compound names of PTPN6 inhibitors corresponding to compound numbers

| Compound number | Compound name                                   | CAS number  |
|-----------------|-------------------------------------------------|-------------|
| 24              | 3'-hydroxygenkwanin                             | 20243-59-8  |
| 65              | Alpha-Boswellic acid                            | 471-66-9    |
| 111             | Beta,beta-Dimethylacrylshikonin                 | 24502-79-2  |
| 189             | Cyanidin chloride                               | 528-58-5    |
| 208             | Demethylzeylasteral                             | 107316-88-1 |
| 240             | Epicatechin gallate                             | 1257-08-5   |
| 271             | Gallic Acid Ethyl Ester                         | 831-61-8    |
| 272             | Gallocatechin gallate                           | 4233-96-9   |
| 273             | Gambogic acid                                   | 2752-65-0   |
| 290             | Ginkgolic Acid C17:1                            | 111047-30-4 |
| 298             | Gracillin                                       | 19083-00-2  |
| 335             | Icariside I                                     | 56725-99-6  |
| 362             | Juglone                                         | 481-39-0    |
| 429             | Myricetrin                                      | 17912-87-7  |
| 439             | Neogambogic acid                                | 93772-31-7  |
| 475             | Parishin A                                      | 62499-28-9  |
| 506             | Polyphyllin II                                  | 50773-42-7  |
| 527             | Punicalin                                       | 65995-64-4  |
| 543             | Ricinoleic acid                                 | 141-22-0    |
| 558             | Salvianolic acid C                              | 115841-09-3 |
| 576             | Scutellarein                                    | 529-53-3    |
| 583             | Sennoside B                                     | 128-57-4    |
| 632             | Timosaponin AIII                                | 41059-79-4  |
| 753             | 3-Acetyl-11-keto-beta-boswellic Acid            | 67416-61-9  |
| 864             | Dehydroandrographolide Succinate Potassium Salt | 76958-99-1  |
| 875             | Erucic acid                                     | 112-86-7    |
| 891             | Agaricic acid                                   | 666-99-9    |
| 925             | Methyl syringate                                | 884-35-5    |
| 1026            | Hederagenin                                     | 465-99-6    |
| 1073            | Quercetin Dihydrate                             | 6151-25-3   |
| 1094            | Tanshinone IIA sodium sulfonate                 | 69659-80-9  |

**Table S2.** Details of the recombinant constructs and optimized purification methods

| Gene name | Vector       | Tag                               | IPTG concentration | Induction temperature & time | Resin  | sequence      |
|-----------|--------------|-----------------------------------|--------------------|------------------------------|--------|---------------|
| PTPRJ     | pET 30a DEVD | N-terminal His                    | 0.1 mM             | 18 °C, 16 h                  | TALON® | 1019-1311 a.a |
| PTPN1     | pET 28a DEVD | C-terminal His                    | 0.1 mM             | 18 °C, 16 h                  | TALON® | 1-299 a.a     |
| PTPN2     | pET 28a DEVD | N-terminal MBP and C-terminal His | 0.1 mM             | 18 °C, 16 h                  | TALON® | 1-381 a.a     |
| PTPN3     | pET 28a DEVD | N-terminal MBP and C-terminal His | 0.1 mM             | 18 °C, 16 h                  | TALON® | 403-913 a.a   |
| PTPN6     | pET 30a DEVD | N-terminal His                    | 0.1 mM             | 18 °C, 16 h                  | TALON® | Full          |
| PTPN7     | pET 28a DEVD | N-terminal MBP and C-terminal His | 0.1 mM             | 18 °C, 16 h                  | TALON® | 281-533 a.a   |
| PTPN9     | pET 28a DEVD | N-terminal His                    | 0.1 mM             | 18 °C, 16 h                  | TALON® | 277-581 a.a   |
| PTPN11    | pET 30a DEVD | N-terminal His                    | 0.1 mM             | 18 °C, 16 h                  | TALON® | 1-526 a.a     |
| PTPN12    | pET 28a DEVD | N-terminal MBP and C-terminal His | 0.1 mM             | 18 °C, 16 h                  | TALON® | 1-334 a.a     |
| PTPN14    | pET 28a DEVD | N-terminal MBP and C-terminal His | 0.1 mM             | 18 °C, 16 h                  | TALON® | 908-1187 a.a  |
| PTPN18    | pET 28a DEVD | N-terminal MBP and C-terminal His | 0.1 mM             | 18 °C, 16 h                  | TALON® | 1-300 a.a     |
| PTPN21    | pET 28a DEVD | N-terminal MBP and C-terminal His | 0.1 mM             | 18 °C, 16 h                  | TALON® | 839-1174 a.a  |
| DUSP9     | pET 28a DEVD | N-terminal MBP and C-terminal His | 0.1 mM             | 18 °C, 16 h                  | TALON® | Full          |
| DUSP3     | pET 28a DEVD | N-terminal MBP and C-terminal His | 0.1 mM             | 18 °C, 16 h                  | TALON® | 1-181 a.a     |
| DUSP12    | pET 28a DEVD | N-terminal MBP and C-terminal His | 0.1 mM             | 18 °C, 16 h                  | TALON® | 1-340 a.a     |
| DUSP14    | pET 28a DEVD | N-terminal MBP and C-terminal His | 0.1 mM             | 18 °C, 16 h                  | TALON® | 1-198 a.a     |
| DUSP15    | pET 28a DEVD | N-terminal MBP and C-terminal His | 0.1 mM             | 18 °C, 16 h                  | TALON® | 1-235 a.a     |
| DUSP18    | pET 28a DEVD | N-terminal MBP and C-terminal His | 0.1 mM             | 18 °C, 16 h                  | TALON® | 1-188 a.a     |
| DUSP22    | pET 28a DEVD | N-terminal MBP and C-terminal His | 0.1 mM             | 18 °C, 16 h                  | TALON® | 1-184 a.a     |
| SSH2      | pET 28a DEVD | N-terminal MBP and C-terminal His | 0.1 mM             | 18 °C, 16 h                  | TALON® | 298-449 a.a   |

**Table S3.** Kinetic properties of 20 PTPs

| <b>PTP name</b> | <b>pH</b> | <b>Concentration (nM)</b> | <b><math>K_m</math> (<math>\mu</math>M)</b> |
|-----------------|-----------|---------------------------|---------------------------------------------|
| PTPRJ           | 6         | 0.03                      | 66.4                                        |
| PTPN1           | 6         | 0.15                      | 21.6                                        |
| PTPN2           | 6         | 0.25                      | 20.0                                        |
| PTPN3           | 6         | 1                         | 2.0                                         |
| PTPN6           | 7         | 2                         | 86.3                                        |
| PTPN7           | 6         | 0.5                       | 25.5                                        |
| PTPN9           | 7         | 0.15                      | 110                                         |
| PTPN11          | 6         | 10                        | 100                                         |
| PTPN12          | 6         | 0.6                       | 75.8                                        |
| PTPN14          | 6         | 30                        | 423.7                                       |
| PTPN18          | 6         | 0.5                       | 5.5                                         |
| PTPN21          | 8         | 20                        | 46.7                                        |
| DUSP9           | 7         | 200                       | 35.0                                        |
| DUSP3           | 6         | 1                         | 100.0                                       |
| DUSP12          | 6         | 0.1                       | 19.0                                        |
| DUSP14          | 6         | 15                        | 55.0                                        |
| DUSP15          | 7         | 45                        | 9.1                                         |
| DUSP18          | 7         | 37                        | 29.0                                        |
| DUSP22          | 6         | 10                        | 13.0                                        |
| SSH2            | 6         | 10                        | 215.3                                       |

**Table S4.** The sequence of PTPN6 siRNA

|           | <b>Sequence (5'-3')</b>    |
|-----------|----------------------------|
| Sense     | CAGGAGGUAAGAAUCUACACCAAC   |
| Antisense | GUUGGUGUAGAUUCUUUACCUCUGCU |

**Table S5.** The sequence of primers

| Gene               | Forward (5'-3')      | Reverse (5'-3')      |
|--------------------|----------------------|----------------------|
| Mouse <i>PTPN6</i> | CTTGGCAGGAGAACTCGT   | GCCATATCTCCCGAACCAGG |
| Mouse <i>GAPDH</i> | GGCAAATTCAACGGCACAGT | GGCGGAGATGATGACCCTTT |
